# Supplementary material
Source: HighWire-hosted journal article supplement (https://rc.rcjournal.com/highwire/filestream/21710/field_highwire_adjunct_files/0/Burr.pdf)

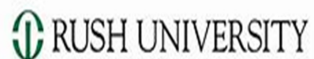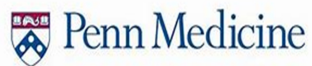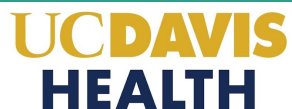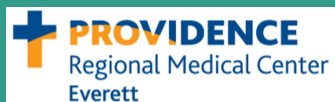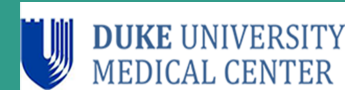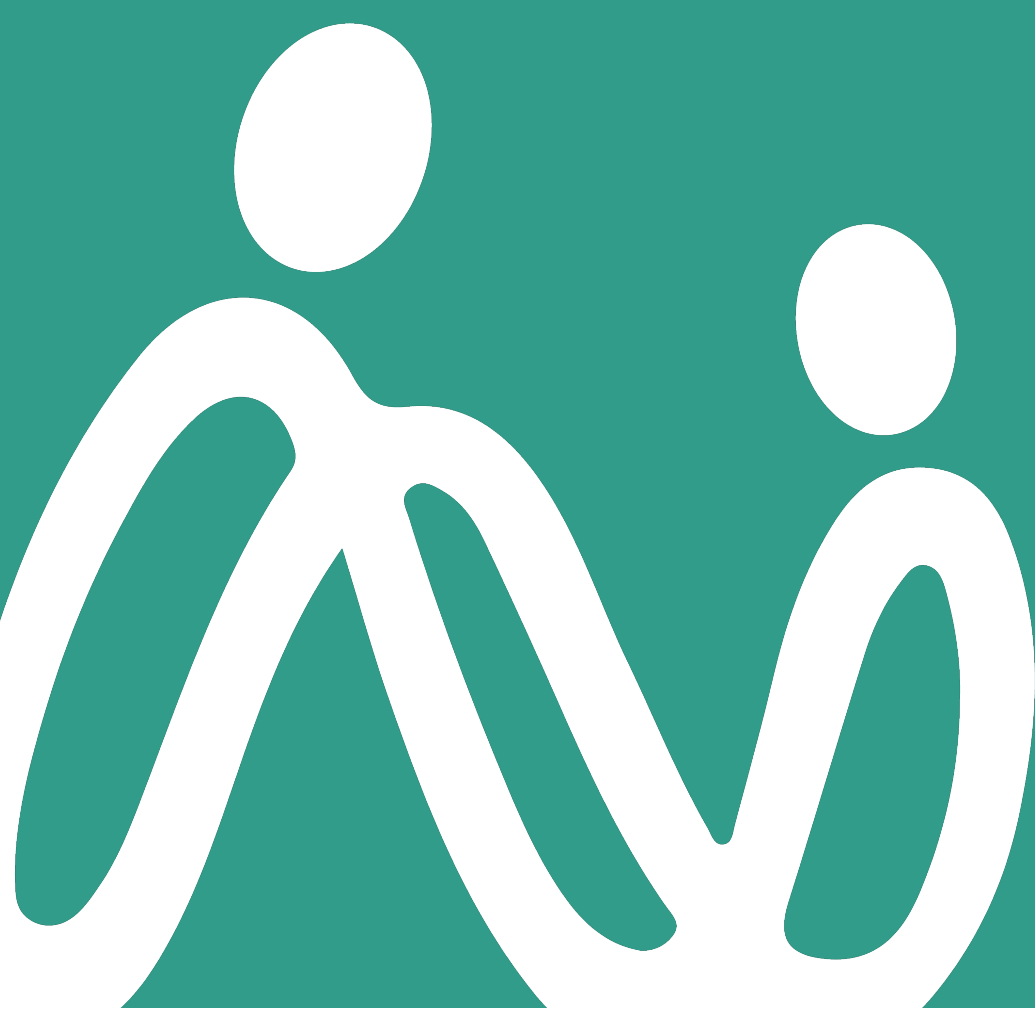

# Factors Associated with a Positive View of Respiratory Care Leadership

Katlyn L. Burr, Carl R. Hinkson, Brian J. Smith, Karsten J. Roberts, Shawna L. Strickland, Cheryl Hoerr, Kyle J. Rehder, Andrew G. Miller

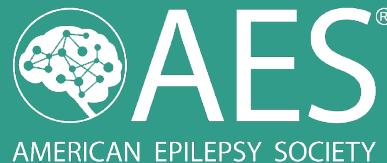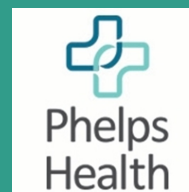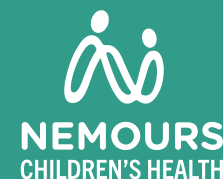

# Disclosures

- Katlyn Burr is a contract trainer for Hill-Rom
- No other disclosures to report

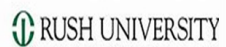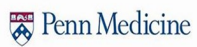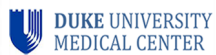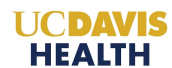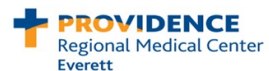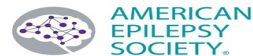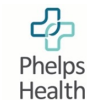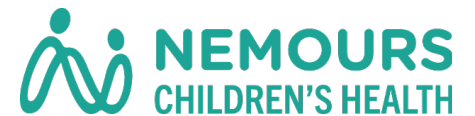

# Background

- Burnout within healthcare is prevalent
  - 71% of nurses and 58% of MDs are currently suffering from burnout<sup>1</sup>
  - 79% of Respiratory Therapists<sup>2</sup>
- Effects from burnout extend individual to the organization and patient
- Burnout and staff well-being is affected by leadership
  - Prior data suggested poor leadership was a driver of burnout in RTs<sup>3</sup>
- Displayed as:
  - Increased anxiety
  - Depression
  - Excessive alcohol and drug use
  - Cardiovascular problems
  - Time off work
- We aimed to identify factors associated with a positive or negative view of leadership perception

1. Moll et al. Crit Care Med 2021.

2. Miller AG et al. Respir Care 2021:(In press).

3. Miller AG et al. Respir Care 2021;66(5):715-723.

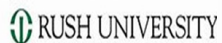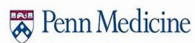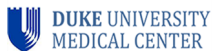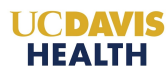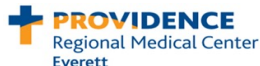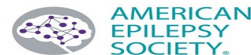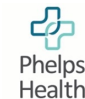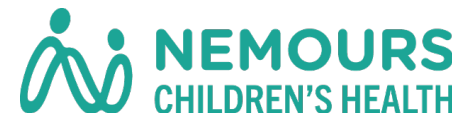

# Methods

- Post-hoc analysis of an IRB exempt burnout survey administered to 26 centers
- RT department leadership distributed the survey and sent reminders to their teams
- Survey included:
  - Hospital/Center demographics
  - Staffing, COVID-19 exposure, leadership, emotional exhaustion, and demographics
  - 5 item- SCORE scale to measure personal burnout
  - A singular question to evaluate burnout climate
  - Validated survey to evaluate leadership

# Survey Questions

**Leadership Behaviors - For this section, consider all questions related to the respiratory care department.**

**For directors and managers, please refer to the person or persons you report to.**

|                                                                                                              | Strongly agree        | Agree                 | Neutral or undecided  | Disagree              | Strongly disagree     | N/A or prefer not to answer |
|--------------------------------------------------------------------------------------------------------------|-----------------------|-----------------------|-----------------------|-----------------------|-----------------------|-----------------------------|
| My department director/manager is available at predictable times:                                            | <input type="radio"/>       |
| My department director/manager regularly makes time to provide positive feedback to me about how I am doing: | <input type="radio"/>       |
| My department director/manager provides frequent feedback about my job performance:                          | <input type="radio"/>       |
| My department director/manager provides useful feedback about my job performance:                            | <input type="radio"/>       |

# Results

- 1,080 responses, response rate of 37%
- 66% had a positive view of RT leadership
  - 73% with a positive view were burned out vs 91% with a negative view,  $p < 0.001$
- Factors associated with a positive view of leadership in univariate analysis:
  - Adequate staffing
  - Able to complete all work
  - All individual leadership/burnout questions
  - Burnout climate
  - In a leadership position
  - Worked fewer hours ICU hours
  - Worked in center affiliated with a medical school
  - Day shift
  - Were less likely to care for adult patients
  - Male

# Results

- There were no differences in leadership perception for:
  - COVID-19 exposure
  - Missing work due to illness
  - Highest degree earned
  - Years as an RT
  - Hours worked per week
  - Hours worked per week in the ICU
  - Commute time
  - Race
  - Use of RT protocols

# Results – Multivariable Logistic Regression

Multivariable analysis revealed:

- Factors associated with a positive view of leadership
  - Direct care to COVID-19 patients – OR 5.8-10.5
- Factors associated with a negative view of leadership
  - Inadequate RT staffing – Always (OR 0.28), Frequently (OR 0.27)
  - Staff therapist – OR 0.33
  - Missed work for any reason – OR 0.69
  - Burnout environment – OR 0.42
  - Burnout score – OR 0.98 per point
- Non-significant factors included
  - Highest degree earned, inability to finish all work, patient population cared for, shift, burned out Y/N, hours worked per week, hours worked in the ICU and commute time



# Conclusion

- Most RTs had a positive perception of their leadership
- Negative perceptions of leadership was associated with higher burnout in RTs, inadequate staffing, being a staff RT, burnout environment, and missed work
- RT leadership should focus on employee well-being on burnout reduction practices

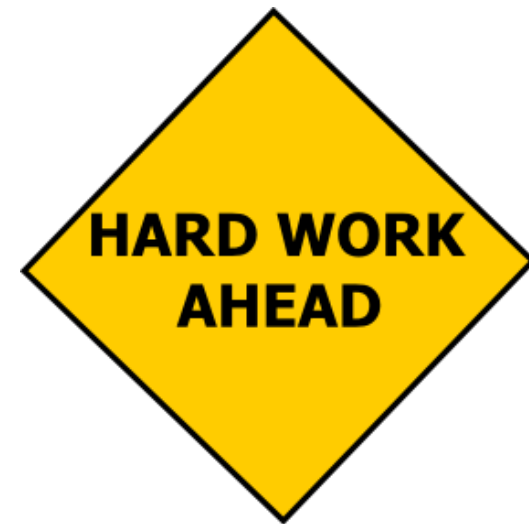

# Questions?

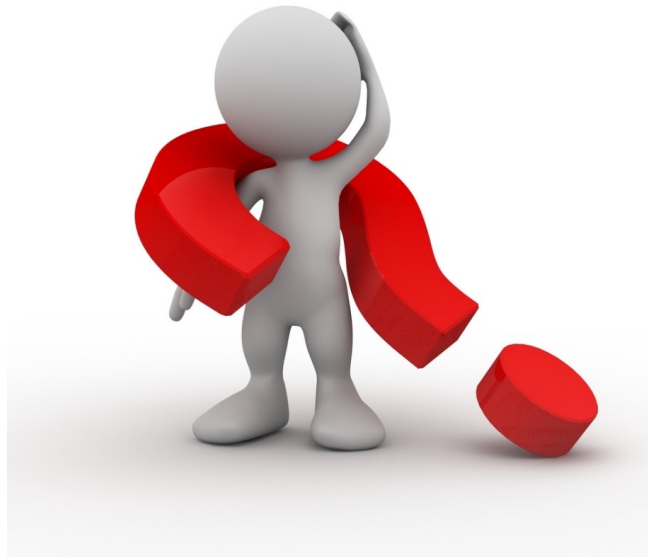

Supplement: Burr.pdf [file Burr.pdf]
